# Supplementary material
Source: HighWire-hosted journal article supplement (https://cmaj.ca/highwire/filestream/80867/field_highwire_adjunct_files/1/210352-image-2-at.pdf)
Supplement: 210352-image-2-at.pdf [file 210352-image-2-at.pdf]

## Appendix 2

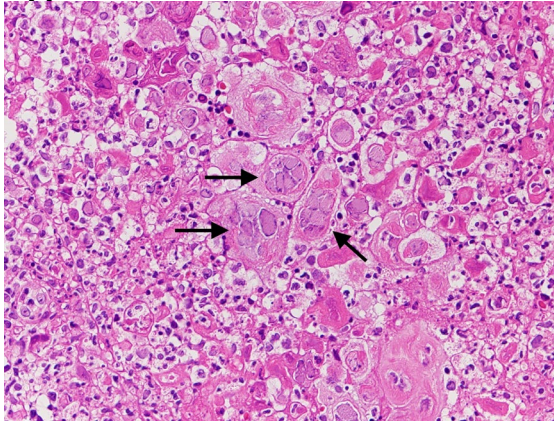

### **Caption.**

**Appendix 2.** Histopathological findings of a glossal biopsy by light microscope (high-power field) showing multinucleated cells with molded ground-glass nuclei (arrows).
